# Supplementary material
Source: PubMed Central journal article supplement (PMC1523236)

# Supplemental Figure 1

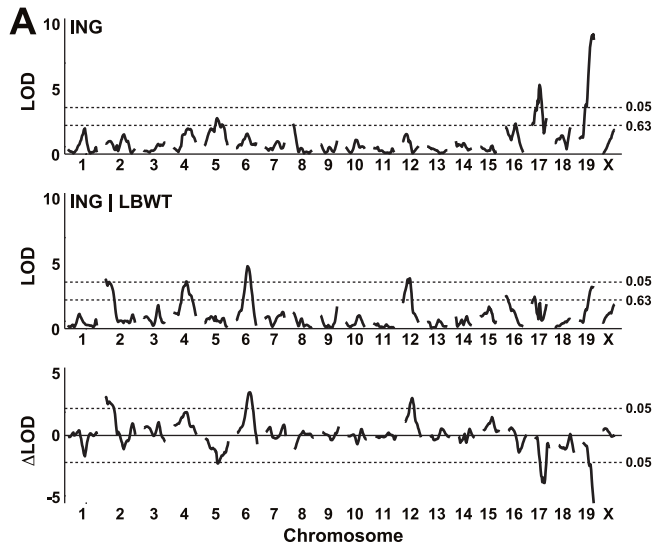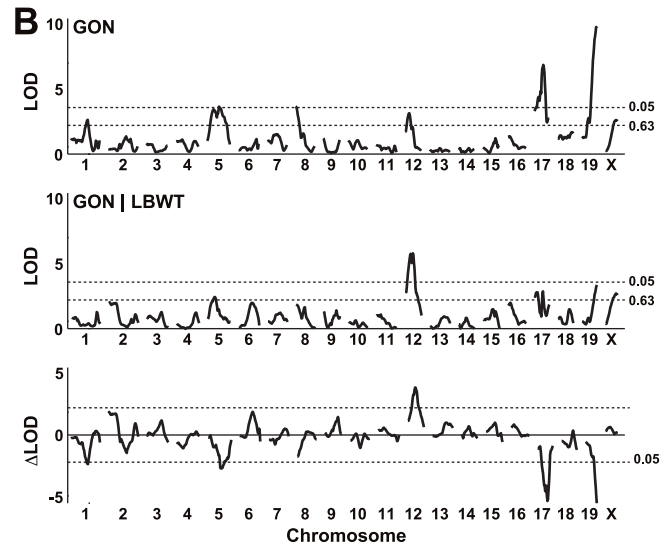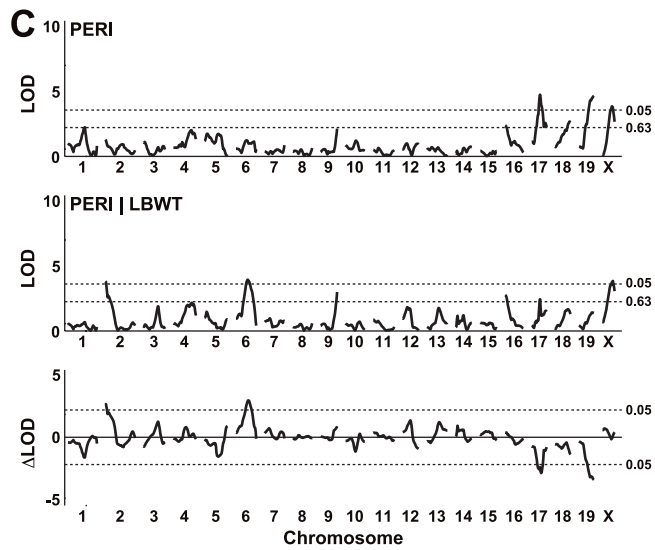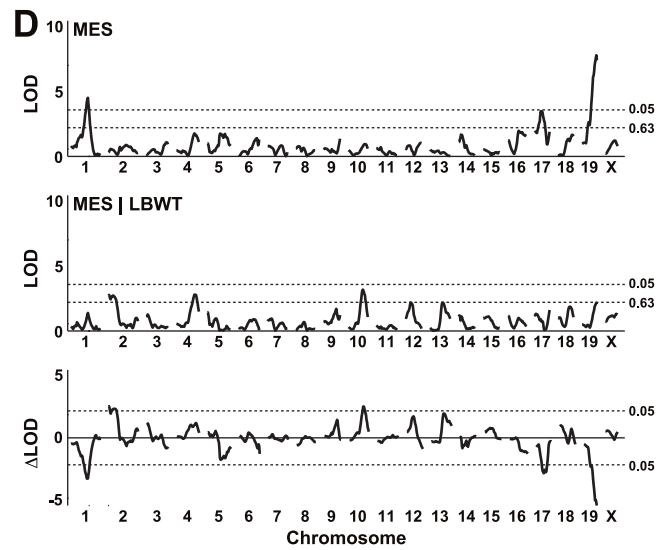

Supplement: pgen.0020114.sg001.pdf [file pgen.0020114.sg001.pdf]

Supplemental Figure 2

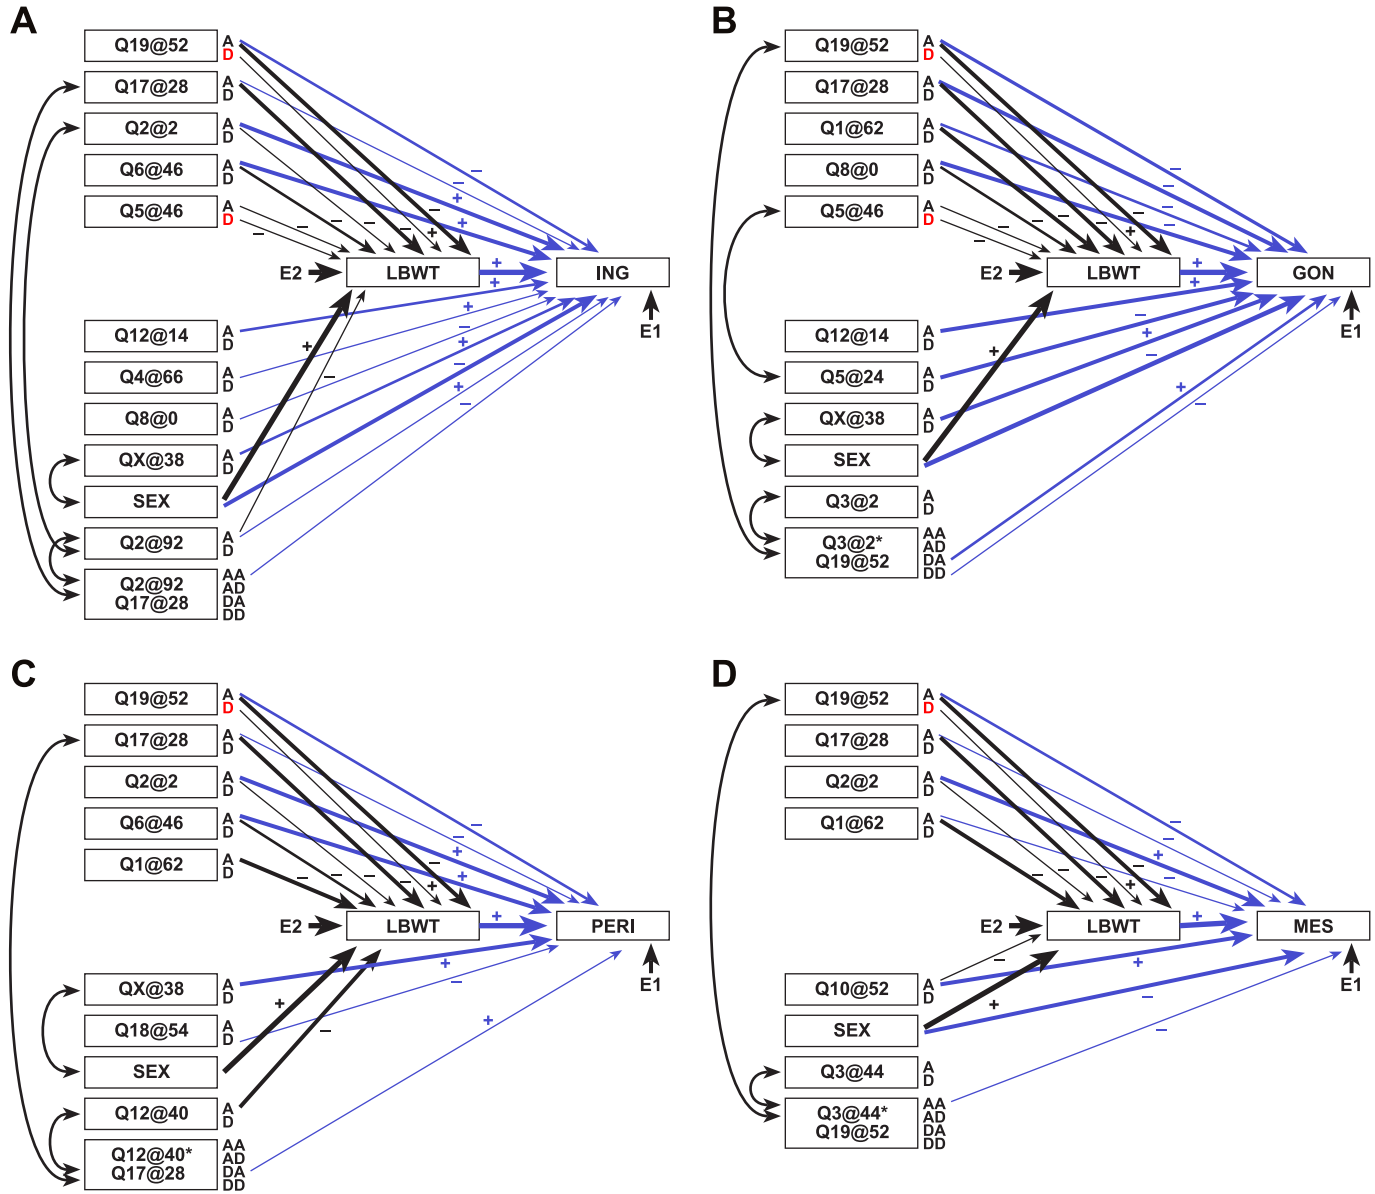

Supplement: pgen.0020114.sg002.pdf [file pgen.0020114.sg002.pdf]
